# Supplementary material for: Preparation and Characterization of Salt-Mediated Injectable Thermosensitive Chitosan/Pectin Hydrogels for Cell Embedding and Culturing
Source: MDPI journal article supplement (doi:10.3390/polym13162674), 2021-08-10
Supplement: s1 [file s1]

# Preparation and characterization of salt-mediated injectable thermosensitive chitosan/pectin hydrogels for cell-embedding and culturing

G. Morello <sup>1,2,†</sup>, A. Polini <sup>2,†,\*</sup>, F. Scalera <sup>2</sup>, R. Rizzo <sup>2</sup>, G. Gigli <sup>1,2</sup>, and F. Gervaso <sup>2,\*</sup>

<sup>1</sup> Dipartimento di Matematica e Fisica E. De Giorgi, University of Salento, Campus Ecotekne, via Monteroni, 73100 Lecce, Italy; giulia.morello@unisalento.it; giuseppe.gigli@unisalento.it

<sup>2</sup> CNR NANOTEC – Institute of Nanotechnology c/o Campus Ecotekne, via Monteroni, 73100 Lecce, Italy; alessandro.polini@nanotec.cnr.it; francesca.scalera@nanotec.cnr.it; riccardo.rizzo@nanotec.cnr.it; francesca.gervaso@nanotec.cnr.it

<sup>†</sup> These authors equally contributed to this study.

<sup>\*</sup> Correspondence: alessandro.polini@nanotec.cnr.it (AP), francesca.gervaso@nanotec.cnr.it (FG); Tel.: +39 0832 319305

**Table S1.** Hydrogel formulations based of CH+PEC with different GAs, with and without addition of complete DMEM.

| Hydrogel compositions |                                                     |
|-----------------------|-----------------------------------------------------|
| βGP                   | 2.5 mL (Ch/Pec) + 0.5 mL βGP (0.04 M)               |
| PB                    | 2.5 mL (Ch/Pec) + 0.5 mL PB (0.04 M)                |
| SHC                   | 2.5 mL (Ch/Pec) + 0.5 mL SHC (0.04 M)               |
| βGP-DMEM              | 2.5 mL (Ch/Pec) + 0.5 mL βGP (0.04 M) + 0.5 mL DMEM |
| PB-DMEM               | 2.5 mL (Ch/Pec) + 0.5 mL PB (0.04 M) + 0.5 mL DMEM  |
| SHC-DMEM              | 2.5 mL (Ch/Pec) + 0.5 mL SHC (0.04 M) + 0.5 mL DMEM |

**Table S2.** Schematic representation of three hydrogel formulations (βGP-PB-SHC) inversion tube test and injection test through G23 needle at r.t.

| Inversion Tube Test  | βGP        | PB         | SHC        |
|----------------------|------------|------------|------------|
| t=0 r.t.             | No flow    | No Flow    | No Flow    |
| t=2 h 37°C           | /          | /          | /          |
| Injectability (r.t.) | Injectable | Injectable | Injectable |

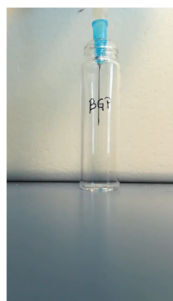

**Video S1.** Injection test.  $\beta$ GP hydrogel formulation injection through syringes equipped with a 23G needle at r.t.

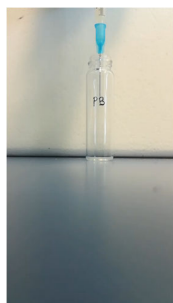

**Video S2.** Injection test. PB hydrogel formulation injection through syringes equipped with a 23G needle at r.t.

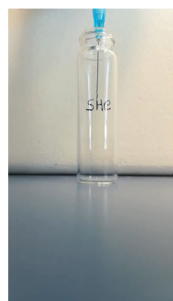

**Video S3.** Injection test. SHC hydrogel formulation injection through syringes equipped with a 23G needle at r.t.

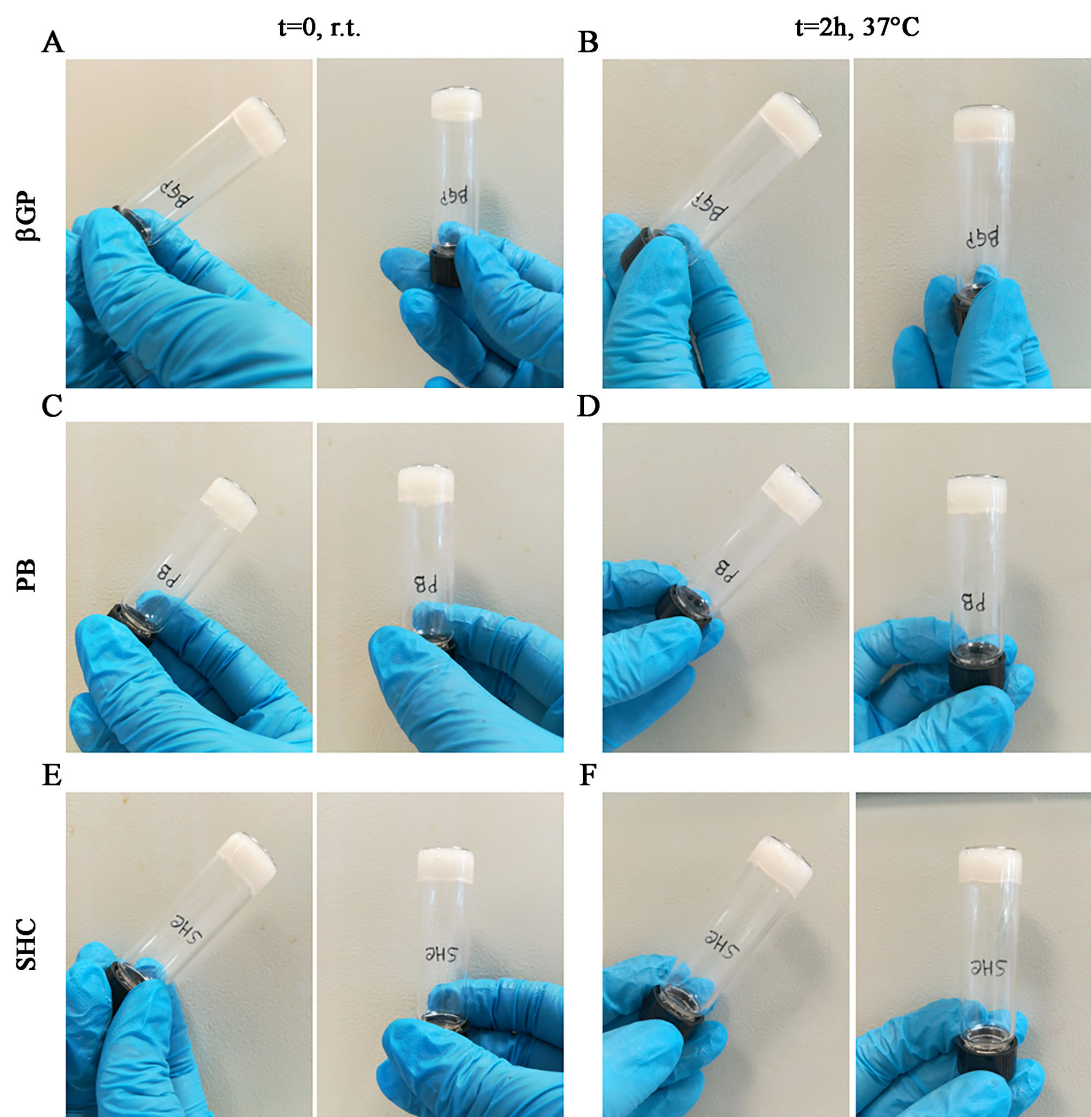

**Figure S1.** Inversion tube test. The three hydrogel formulations,  $\beta$ GP, PB and SHC, at r.t. after mixing (A, C, E), and after 2h of incubation at  $37^\circ\text{C}$  (B, D, F).

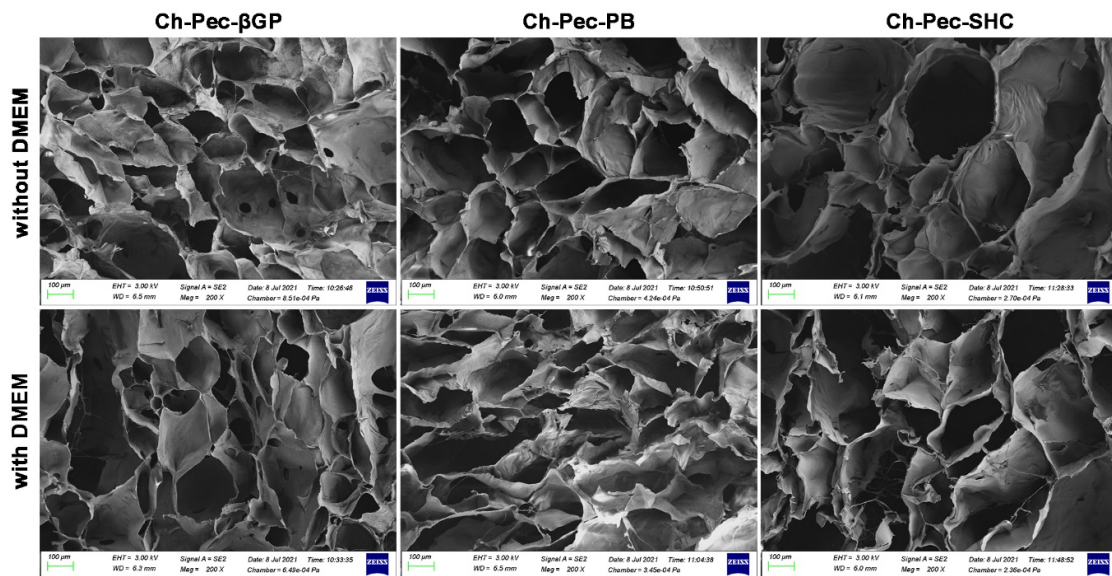

**Figure S2.** Scanning electron micrographs (SEM). Morphological analysis of hydrogel formulations (βGP-PB-SHC) with and without the addition of DMEM, at magnification 200× (scale bar =100 μm).

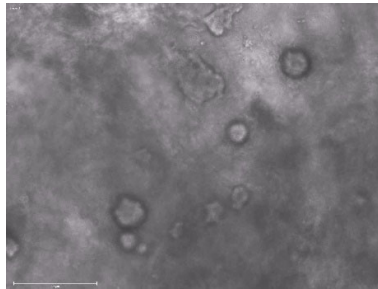

**Video S4.** Z-stack analysis at 10x of spheroids in Ch-Pec-βGP hydrogels after 21 days of culture.

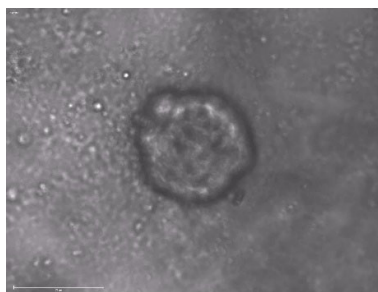

**Video S5.** Z-stack analysis at 40x of a single spheroid in Ch-Pec-βGP hydrogels after 21 days of culture.
